# Supplementary material
Source: PubMed Central journal article supplement (PMC3722279)

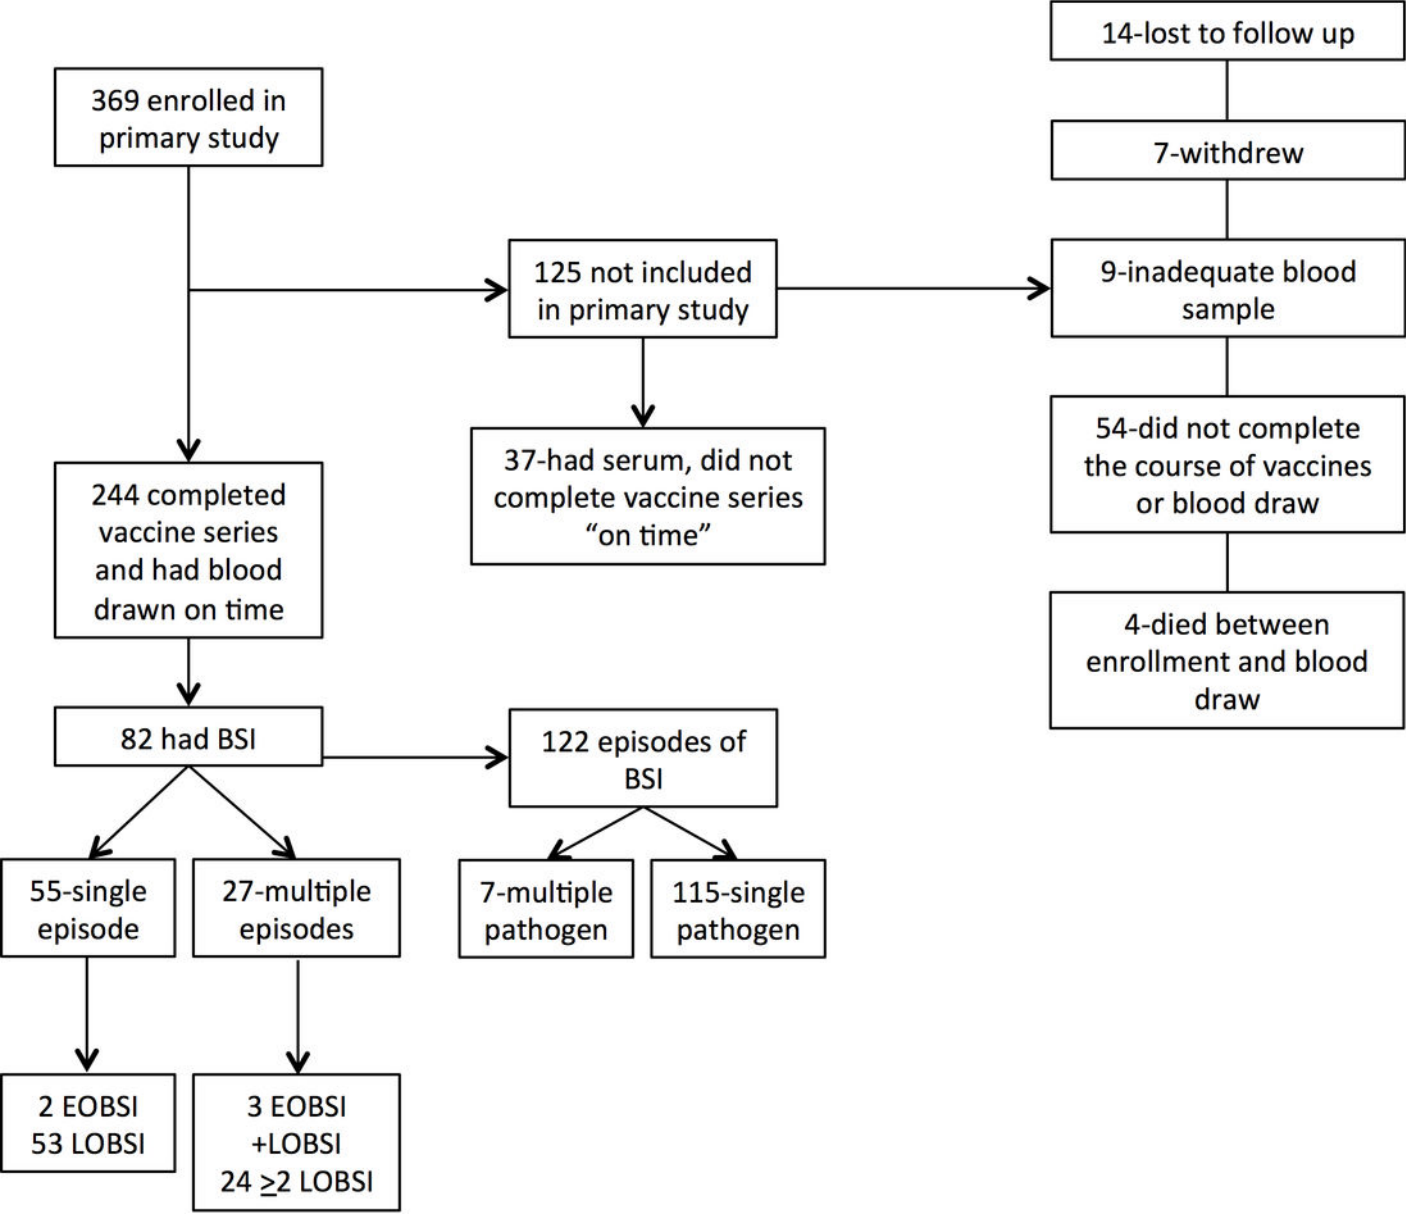

Supplement: NIHMS456419-supplement-Supplemental_figure_1.pdf [file NIHMS456419-supplement-Supplemental_figure_1.pdf]
